# Supplementary material for: One-step synthesis of conjugated enynenitriles from bromocyanoacetylene
Source: Royal Society of Chemistry journal article supplement (doi:10.1039/c6ob02590k), 2017-01-01
Supplement: c6ob02590k1.pdf [file c6ob02590k1.pdf]

**Supporting information for:**

## **One-step synthesis of conjugated enynenitriles from bromocyanoacetylene**

Romain Ligny,<sup>a</sup> Etienne S. Gauthier,<sup>a</sup> Manuel Yáñez,<sup>b</sup> Thierry Roisnel,<sup>c</sup> Jean-Claude  
Guillemin,<sup>a</sup> Y. Trolez<sup>a\*</sup>

<sup>a</sup> École Nationale Supérieure de Chimie de Rennes, UMR 6226, CNRS, 11 Allée de Beaulieu, CS 50837,  
35708 Rennes Cedex 7, France. Tel: 33 2 23 23 80 69

E-mail: [yann.trolez@ensc-rennes.fr](mailto:yann.trolez@ensc-rennes.fr)

<sup>b</sup> Departamento de Química, Módulo 13, Universidad Autónoma de Madrid, Campus de Excelencia  
UAM-CSIC, Cantoblanco, 28049 Madrid, Spain

<sup>c</sup> Centre de Diffractométrie X, Institut des Sciences Chimiques de Rennes, CNRS (UMR 6226),  
Université de Rennes 1, Campus de Beaulieu, 35042 Rennes Cedex, France

|                                                                                                   |    |
|---------------------------------------------------------------------------------------------------|----|
| <b>NMR Section</b> .....                                                                          | 3  |
| <sup>1</sup> H spectrum of compound <b>5</b> (CDCl <sub>3</sub> , 400 MHz).....                   | 3  |
| <sup>13</sup> C spectrum of compound <b>5</b> (CDCl <sub>3</sub> , 125 MHz).....                  | 3  |
| <sup>1</sup> H spectrum of compound <b>6</b> (CDCl <sub>3</sub> , 400 MHz).....                   | 4  |
| <sup>13</sup> C spectrum of compound <b>6</b> (CDCl <sub>3</sub> , 125 MHz).....                  | 4  |
| <sup>1</sup> H spectrum of compound <b>7</b> (CDCl <sub>3</sub> , 400 MHz).....                   | 5  |
| <sup>13</sup> C{ <sup>1</sup> H} spectrum of compound <b>7</b> (CDCl <sub>3</sub> , 125 MHz)..... | 5  |
| <sup>1</sup> H spectrum of compound <b>8</b> (CDCl <sub>3</sub> , 400 MHz).....                   | 6  |
| <sup>13</sup> C spectrum of compound <b>8</b> (CDCl <sub>3</sub> , 125 MHz).....                  | 6  |
| <sup>1</sup> H spectrum of compound <b>9</b> (CDCl <sub>3</sub> , 400 MHz).....                   | 7  |
| <sup>13</sup> C spectrum of compound <b>9</b> (CDCl <sub>3</sub> , 125 MHz).....                  | 7  |
| <sup>1</sup> H spectrum of compound <b>10</b> (CDCl <sub>3</sub> , 400 MHz).....                  | 8  |
| <sup>13</sup> C spectrum of compound <b>10</b> (CDCl <sub>3</sub> , 125 MHz).....                 | 8  |
| <sup>1</sup> H spectrum of compound <b>11</b> (CDCl <sub>3</sub> , 400 MHz).....                  | 9  |
| <sup>13</sup> C spectrum of compound <b>11</b> (CDCl <sub>3</sub> , 125 MHz).....                 | 9  |
| <sup>1</sup> H spectrum of compound <b>12</b> (CDCl <sub>3</sub> , 400 MHz).....                  | 10 |
| <sup>13</sup> C spectrum of compound <b>12</b> (CDCl <sub>3</sub> , 125 MHz).....                 | 10 |
| <sup>1</sup> H spectrum of compound <b>14</b> (CDCl <sub>3</sub> , 400 MHz).....                  | 11 |
| <sup>13</sup> C spectrum of compound <b>14</b> (CDCl <sub>3</sub> , 125 MHz).....                 | 11 |
| <sup>1</sup> H spectrum of compound <b>17</b> (CDCl <sub>3</sub> , 400 MHz).....                  | 12 |
| <sup>13</sup> C spectrum of compound <b>17</b> (CDCl <sub>3</sub> , 125 MHz).....                 | 12 |
| <sup>1</sup> H spectrum of compound <b>18</b> (CDCl <sub>3</sub> , 400 MHz).....                  | 13 |
| <sup>13</sup> C spectrum of compound <b>18</b> (CDCl <sub>3</sub> , 125 MHz).....                 | 13 |
| <sup>1</sup> H spectrum of compound <b>20</b> (CDCl <sub>3</sub> , 400 MHz).....                  | 14 |
| <sup>13</sup> C spectrum of compound <b>20</b> (CDCl <sub>3</sub> , 125 MHz).....                 | 14 |
| <sup>1</sup> H spectrum of compound <b>21</b> (CDCl <sub>3</sub> , 400 MHz).....                  | 15 |
| <sup>13</sup> C spectrum of compound <b>21</b> (CDCl <sub>3</sub> , 125 MHz).....                 | 15 |
| <sup>1</sup> H spectrum of compound <b>22</b> (CDCl <sub>3</sub> , 400 MHz).....                  | 16 |
| <sup>13</sup> C spectrum of compound <b>22</b> (CDCl <sub>3</sub> , 125 MHz).....                 | 16 |
| <sup>1</sup> H spectrum of compound <b>23</b> (CDCl <sub>3</sub> , 400 MHz).....                  | 17 |
| <sup>13</sup> C spectrum of compound <b>23</b> (CDCl <sub>3</sub> , 125 MHz).....                 | 17 |
| <sup>1</sup> H spectrum of compound <b>24</b> (CDCl <sub>3</sub> , 400 MHz).....                  | 18 |
| <b>Theoretical calculations of E/Z conformers of enynes systems</b> .....                         | 19 |

## NMR Section

$^1\text{H}$  spectrum of compound **5** ( $\text{CDCl}_3$ , 400 MHz)

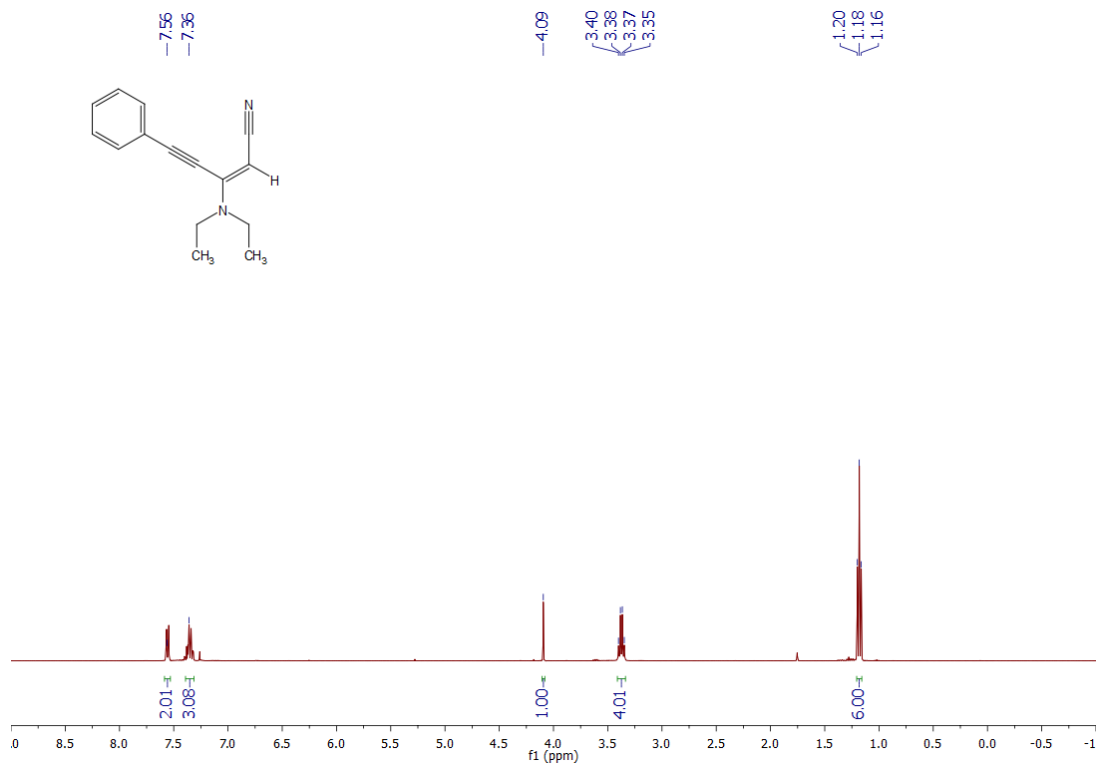

$^{13}\text{C}$  spectrum of compound **5** ( $\text{CDCl}_3$ , 125 MHz)

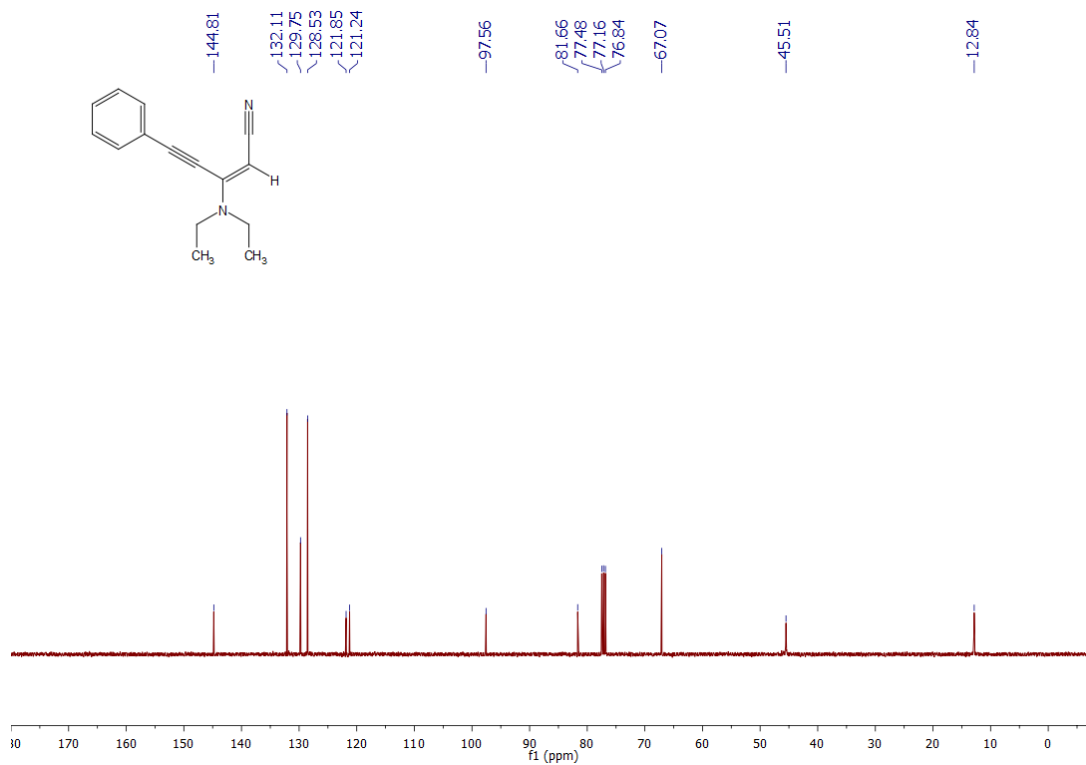

<sup>1</sup>H spectrum of compound **6** (CDCl<sub>3</sub>, 400 MHz)

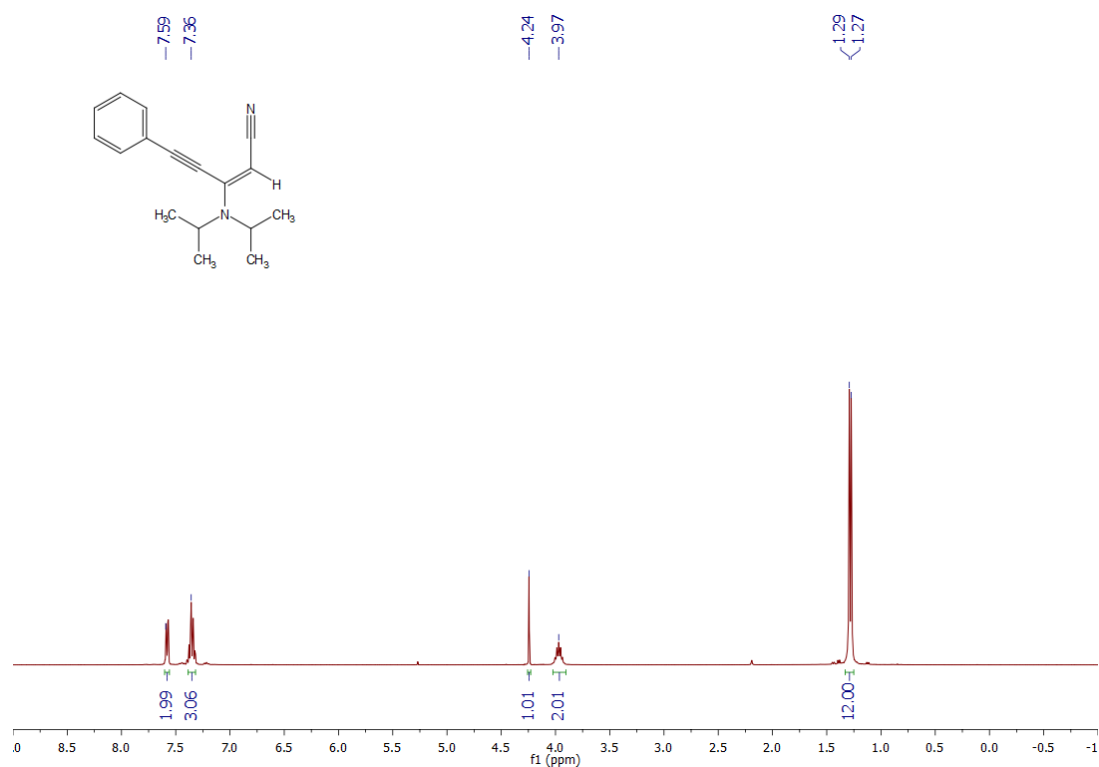

<sup>13</sup>C spectrum of compound **6** (CDCl<sub>3</sub>, 125 MHz)

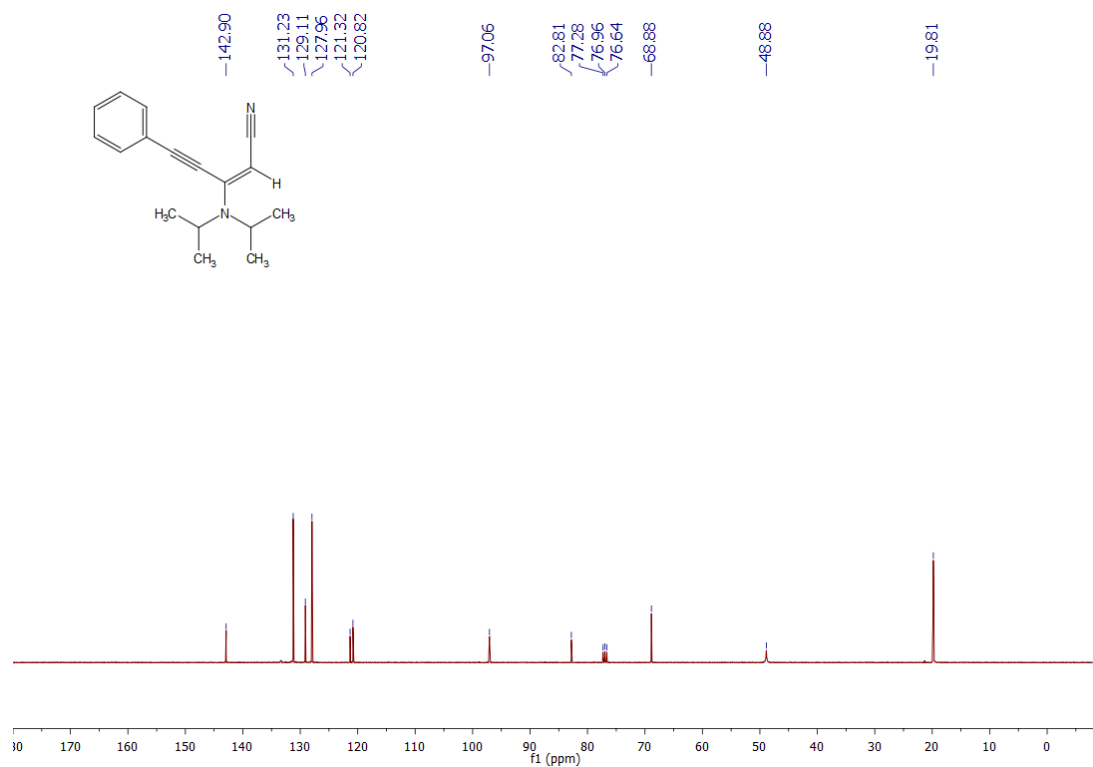

$^1\text{H}$  spectrum of compound **7** ( $\text{CDCl}_3$ , 400 MHz)

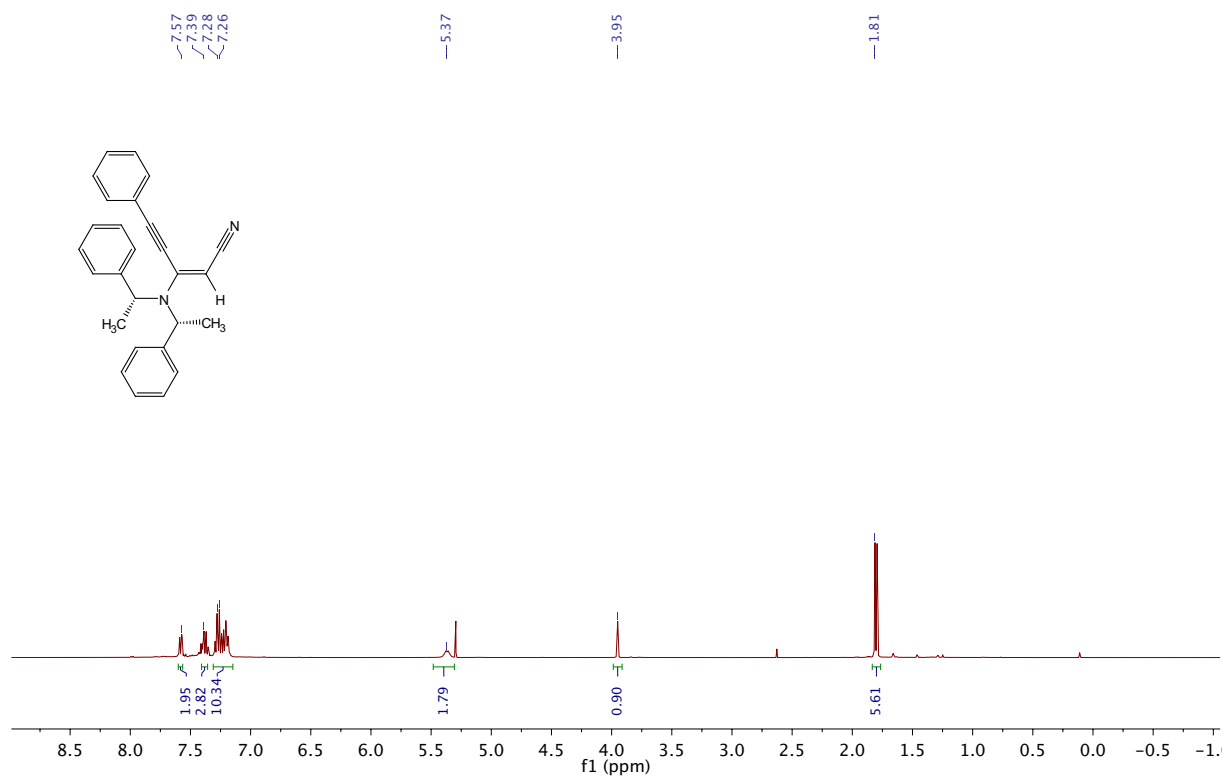

$^{13}\text{C}\{^1\text{H}\}$  spectrum of compound **7** ( $\text{CDCl}_3$ , 125 MHz)

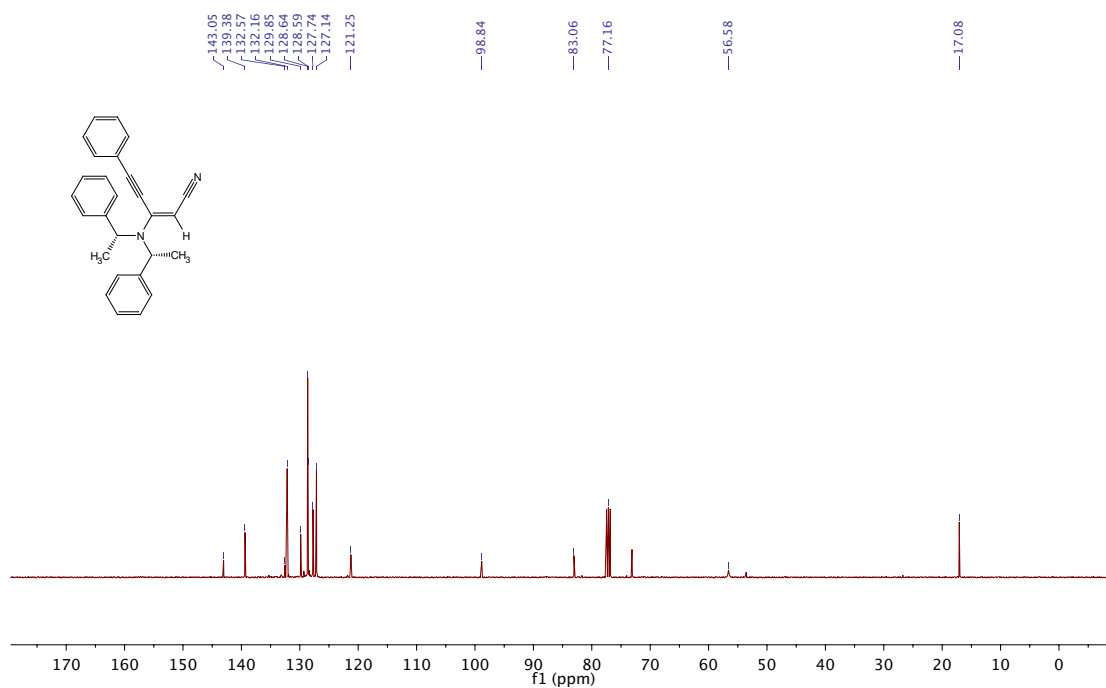

$^1\text{H}$  spectrum of compound **8** ( $\text{CDCl}_3$ , 400 MHz)

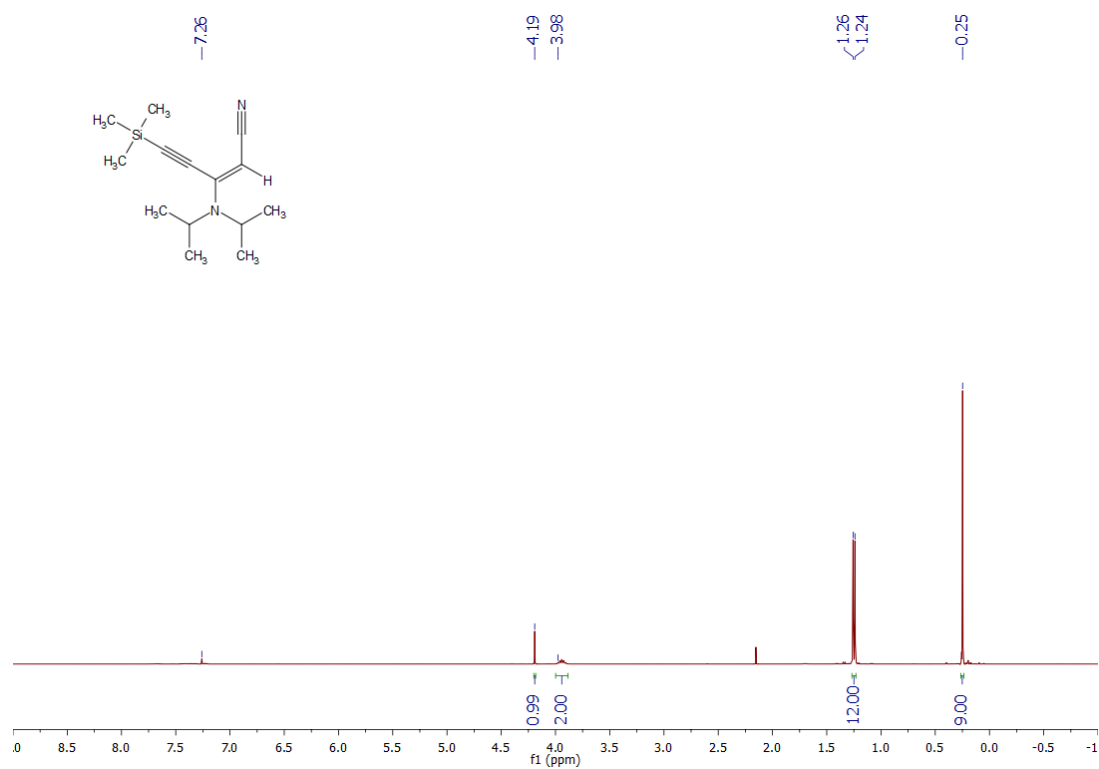

$^{13}\text{C}$  spectrum of compound **8** ( $\text{CDCl}_3$ , 125 MHz)

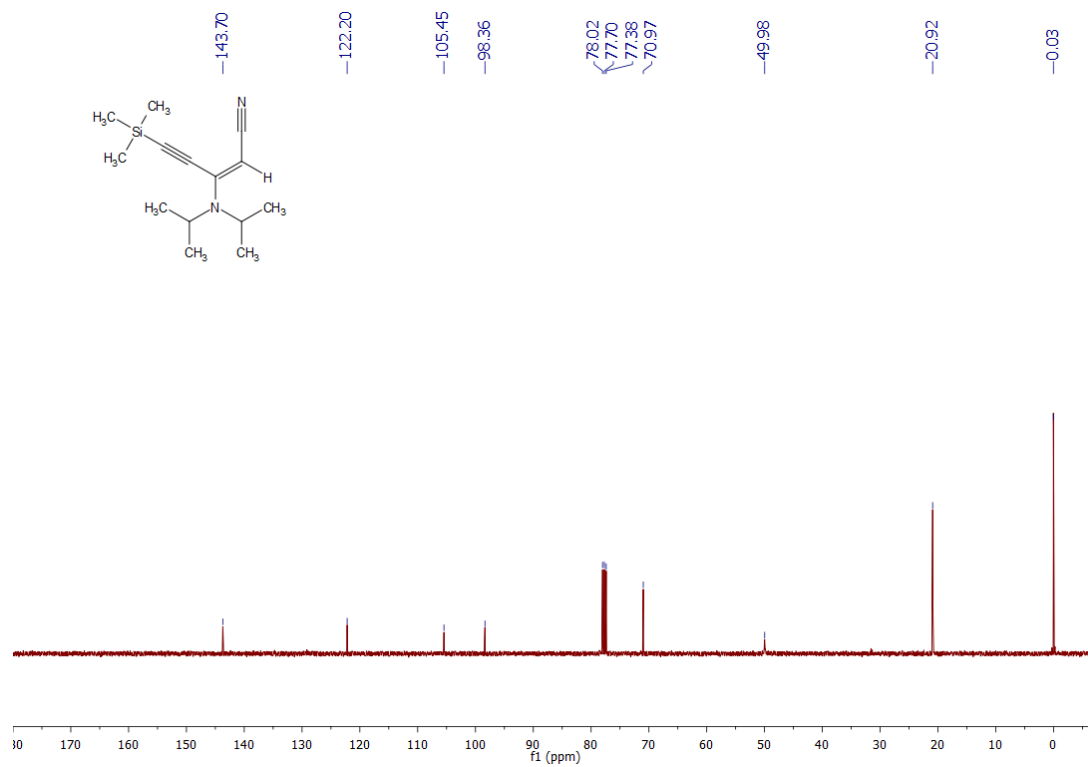

<sup>1</sup>H spectrum of compound **9** (CDCl<sub>3</sub>, 400 MHz)

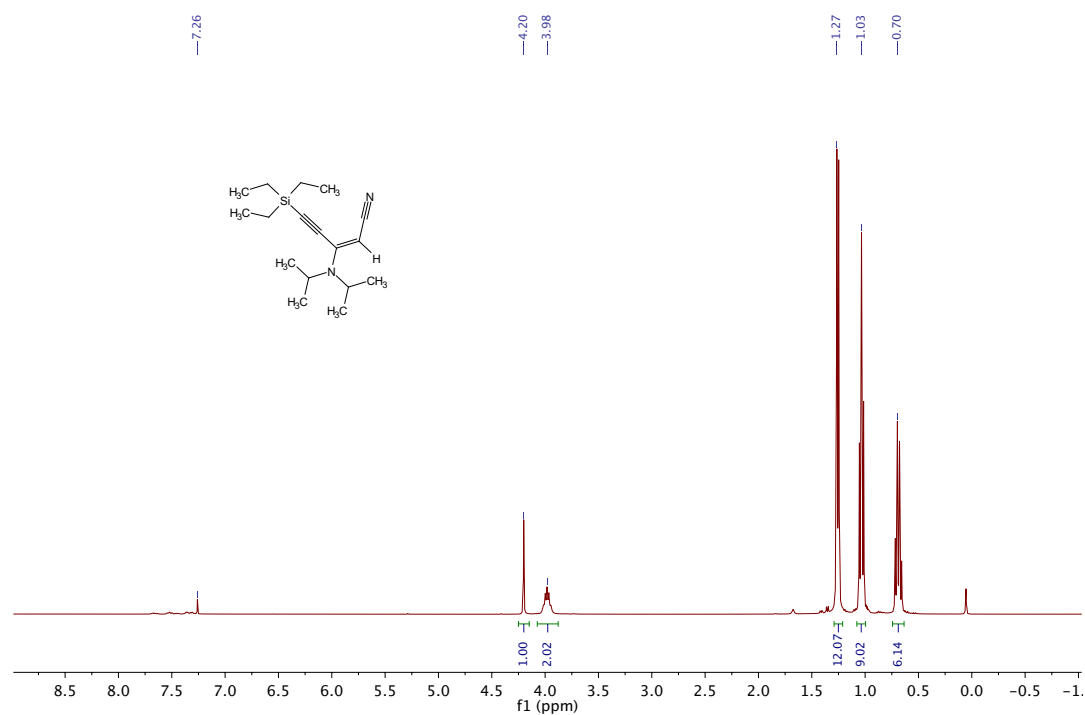

<sup>13</sup>C spectrum of compound **9** (CDCl<sub>3</sub>, 125 MHz)

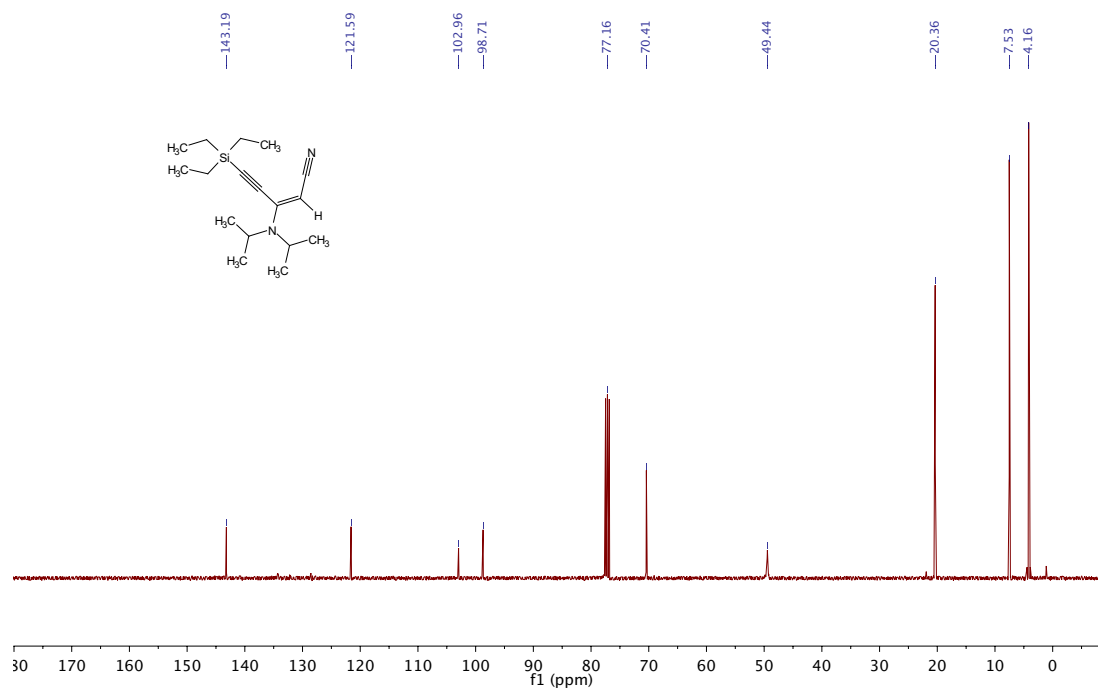

$^1\text{H}$  spectrum of compound **10** ( $\text{CDCl}_3$ , 400 MHz)

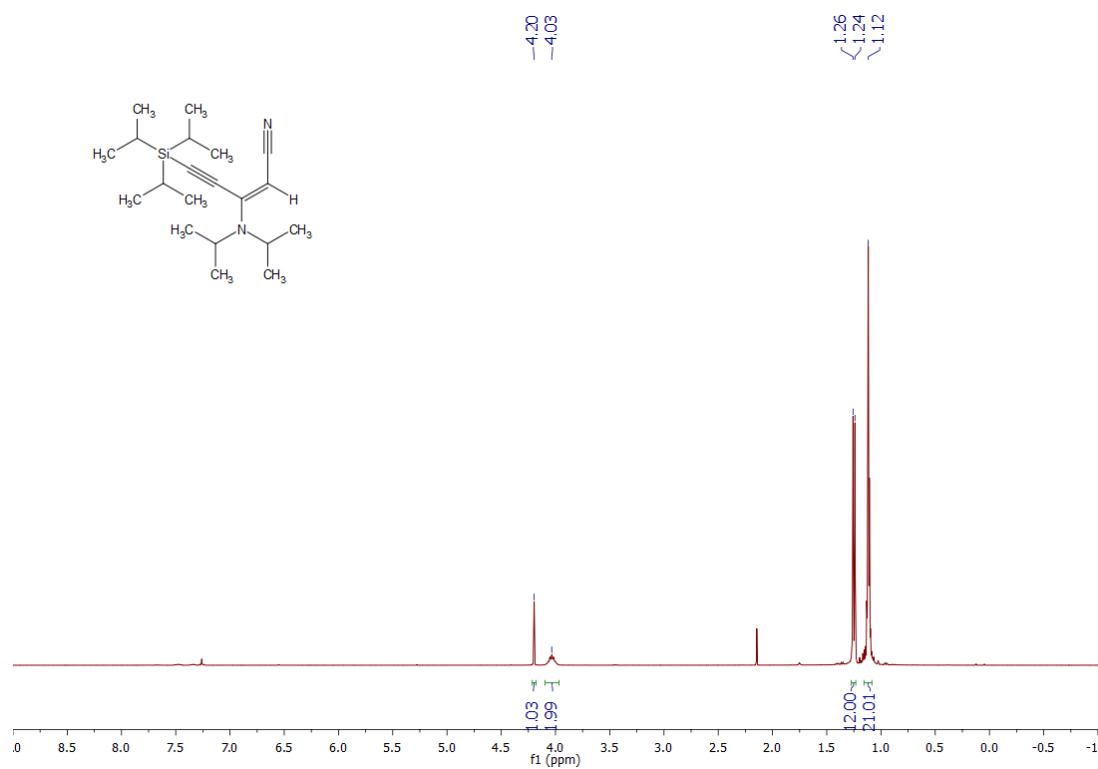

$^{13}\text{C}$  spectrum of compound **10** ( $\text{CDCl}_3$ , 125 MHz)

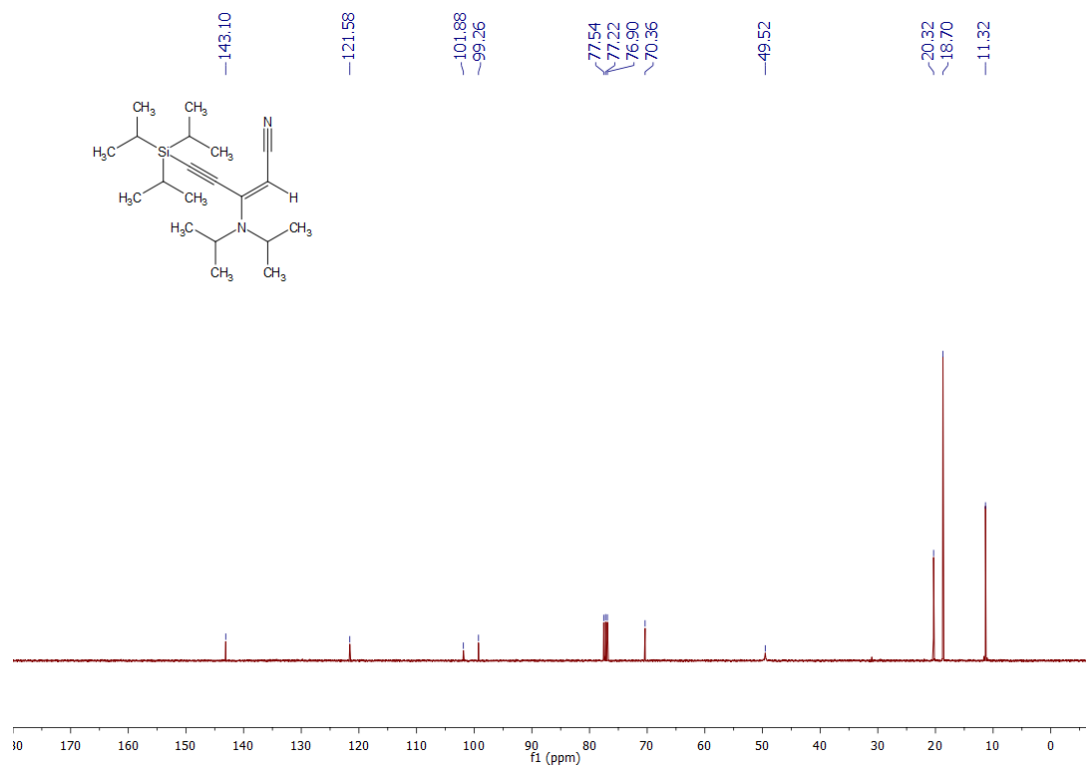



<sup>1</sup>H spectrum of compound **11** (CDCl<sub>3</sub>, 400 MHz)

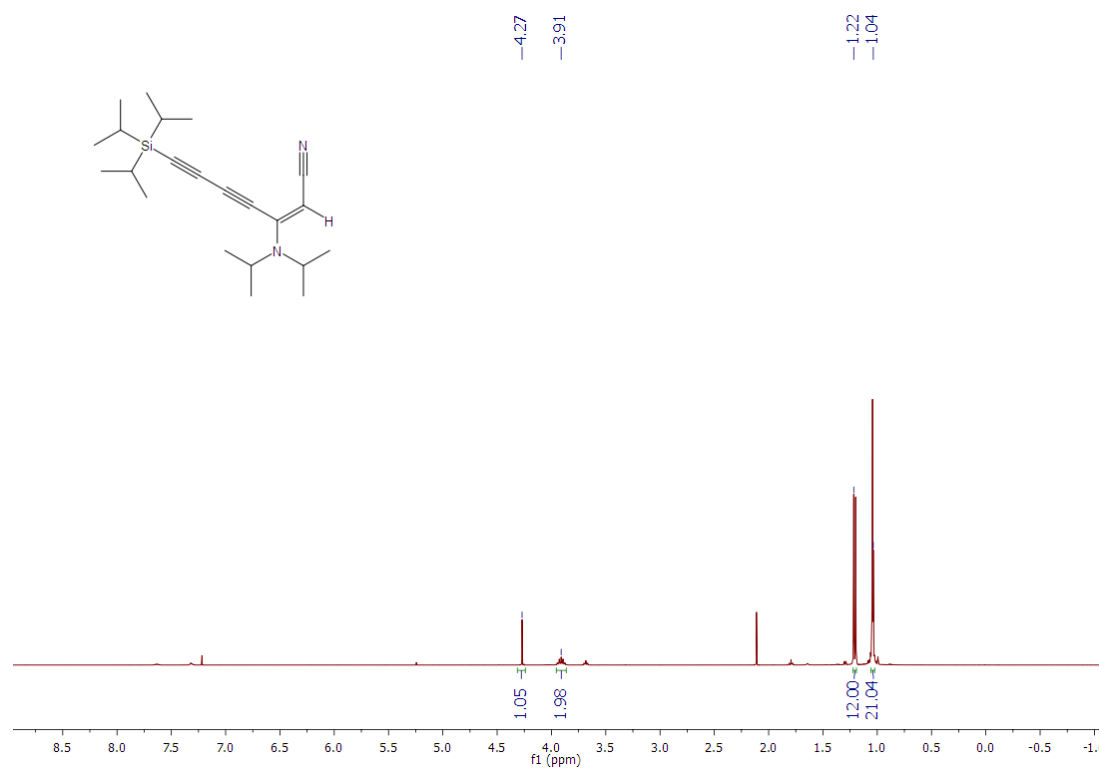

<sup>13</sup>C spectrum of compound **11** (CDCl<sub>3</sub>, 125 MHz)

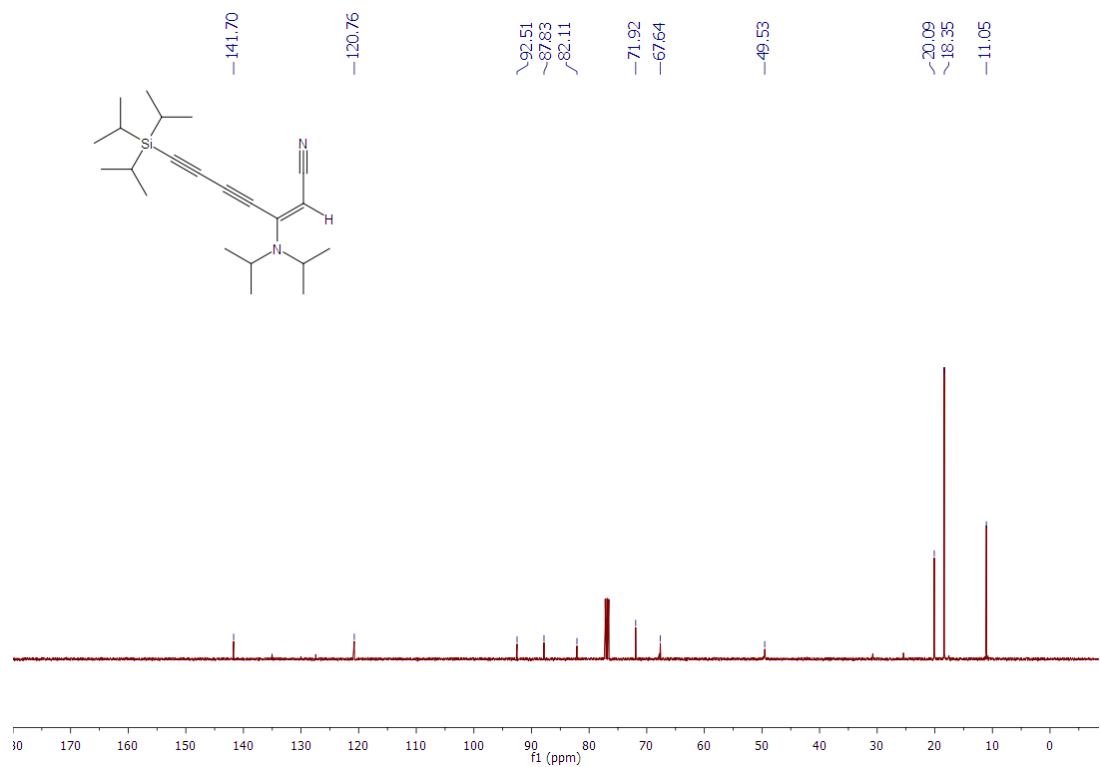

<sup>1</sup>H spectrum of compound **12** (CDCl<sub>3</sub>, 400 MHz)

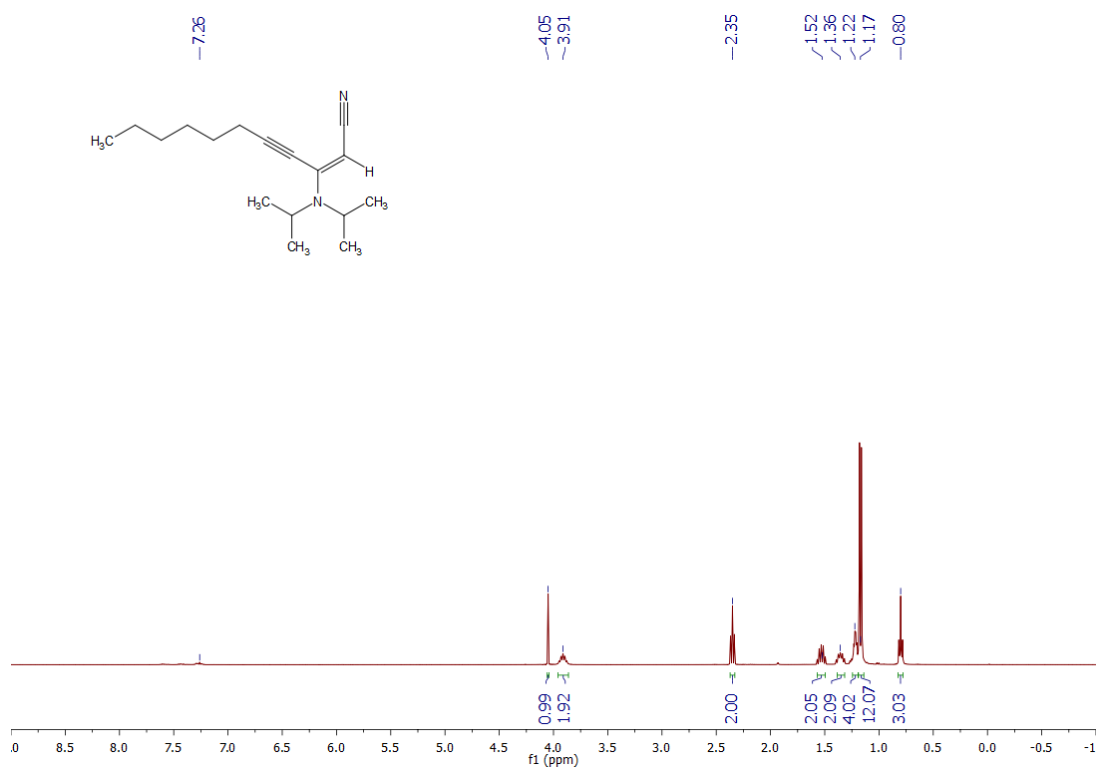

<sup>13</sup>C spectrum of compound **12** (CDCl<sub>3</sub>, 125 MHz)

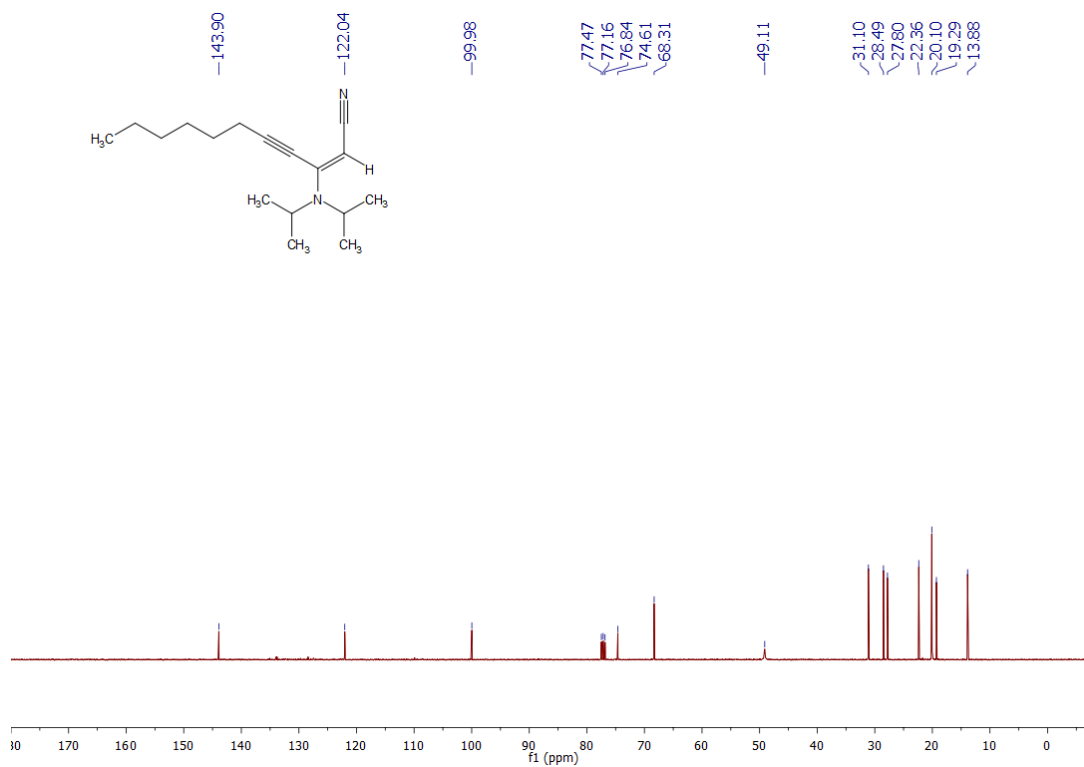

<sup>1</sup>H spectrum of compound **14** (CDCl<sub>3</sub>, 400 MHz)

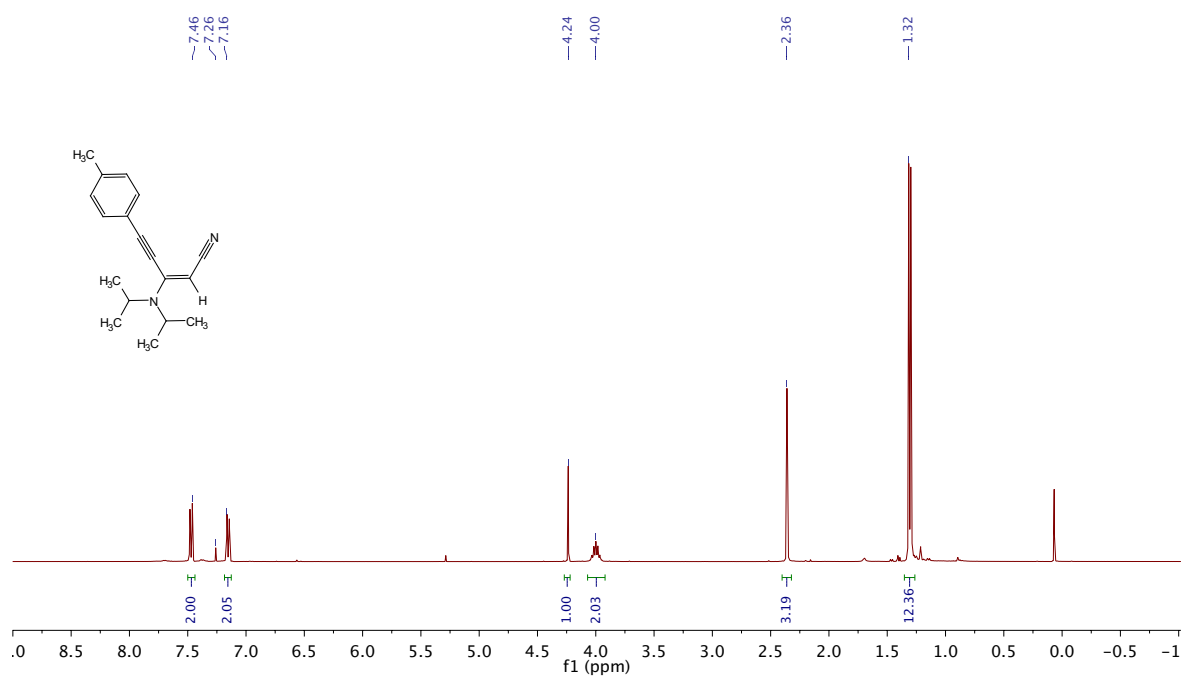

<sup>13</sup>C spectrum of compound **14** (CDCl<sub>3</sub>, 125 MHz)

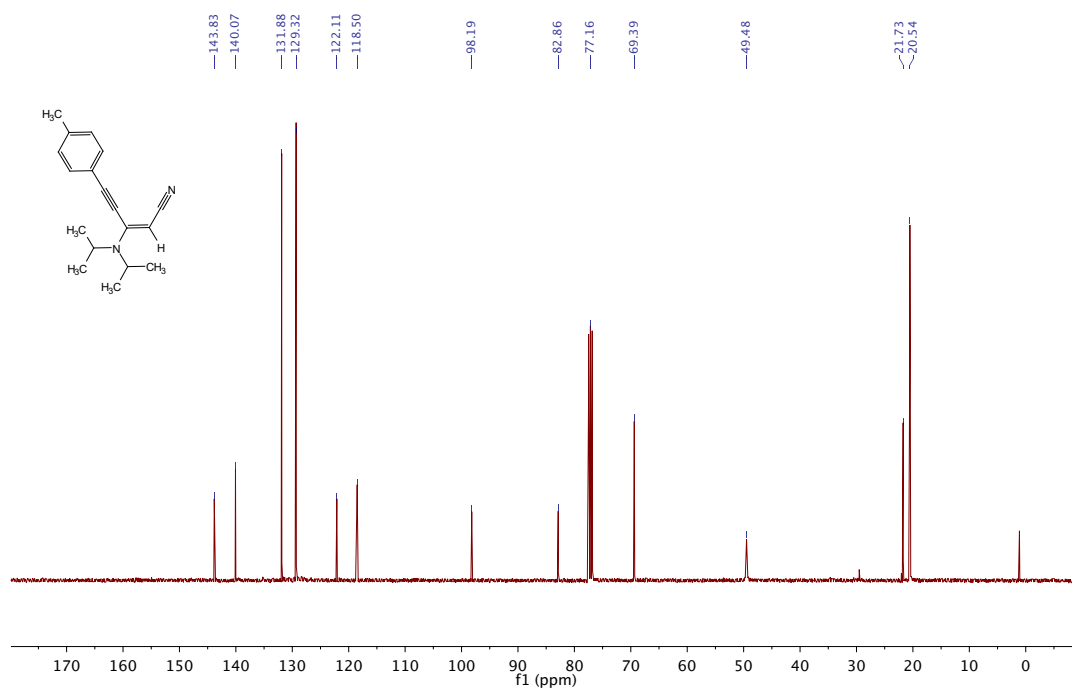

$^1\text{H}$  spectrum of compound **17** ( $\text{CDCl}_3$ , 400 MHz)

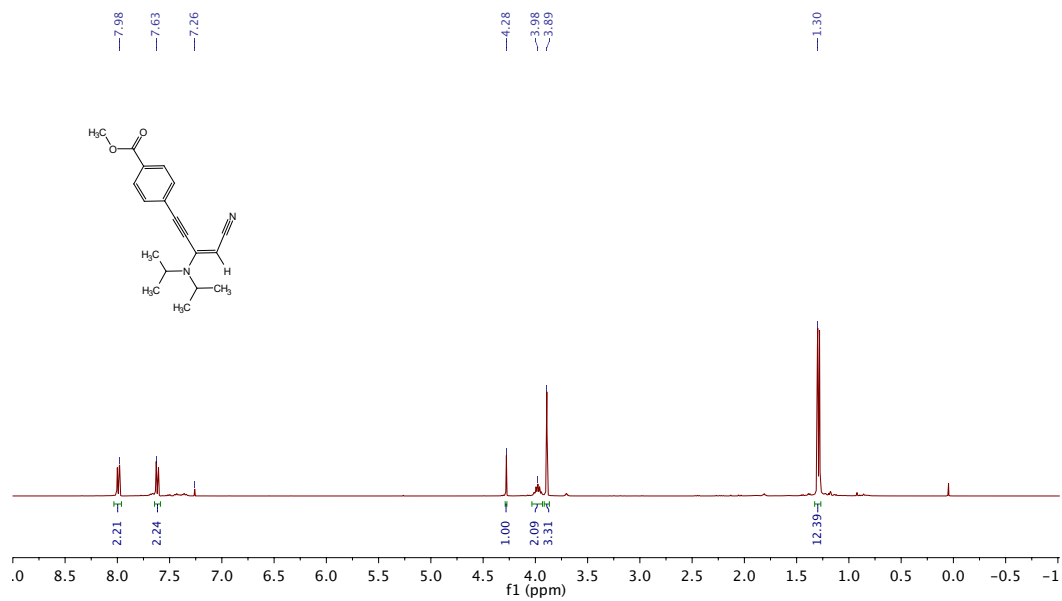

$^{13}\text{C}$  spectrum of compound **17** ( $\text{CDCl}_3$ , 125 MHz)

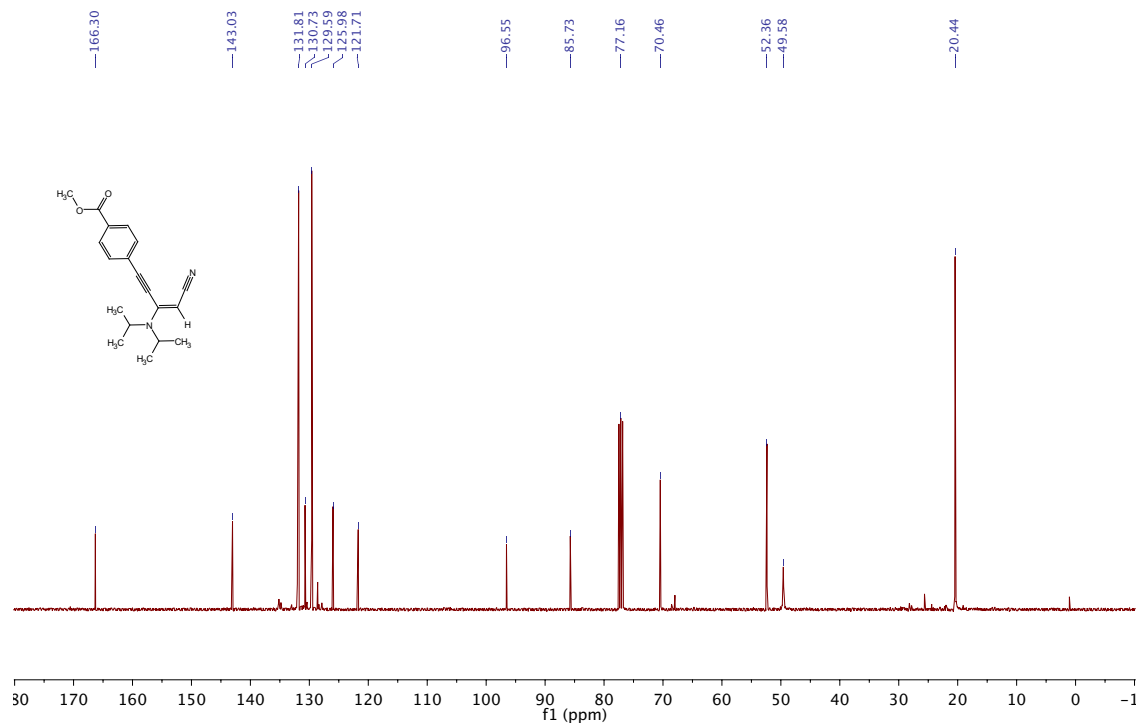

$^1\text{H}$  spectrum of compound **18** ( $\text{CDCl}_3$ , 400 MHz)

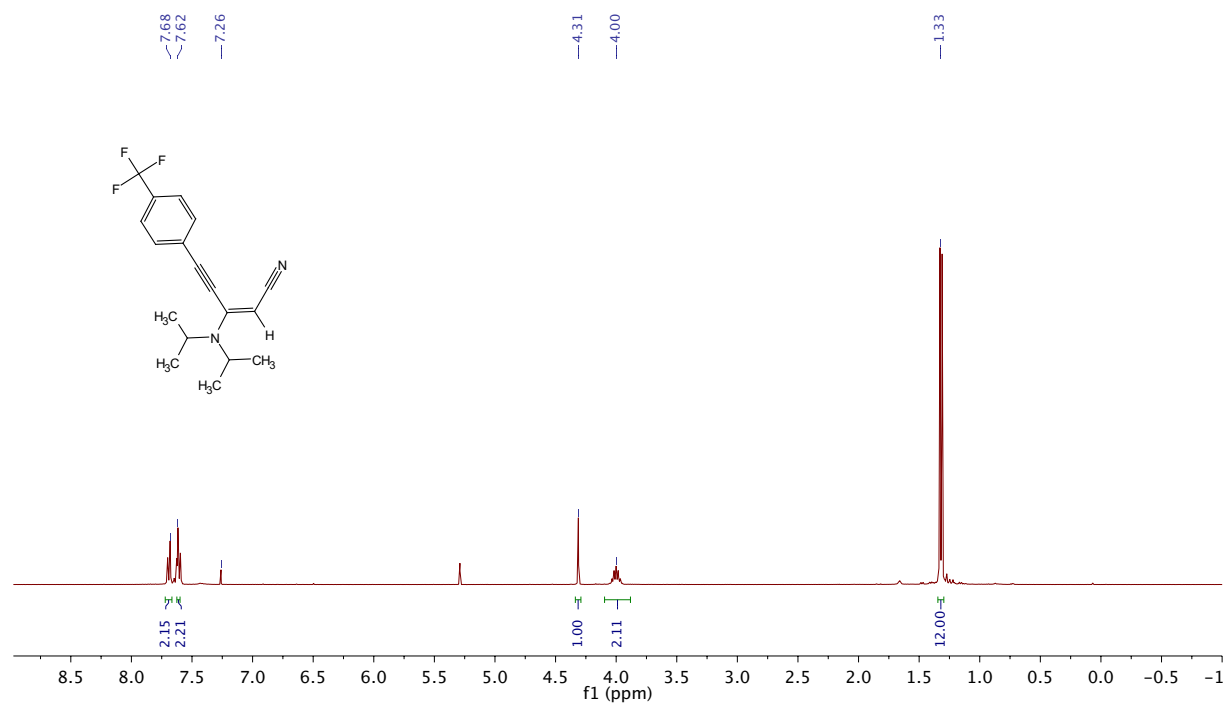

$^{13}\text{C}$  spectrum of compound **18** ( $\text{CDCl}_3$ , 125 MHz)

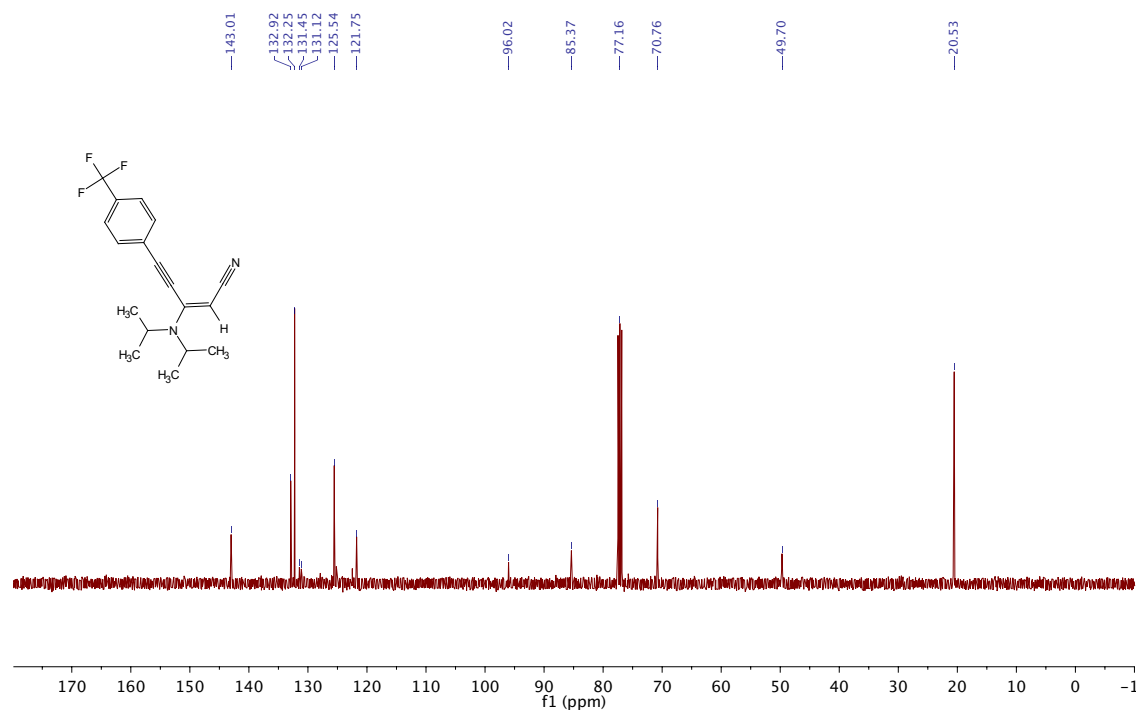



$^1\text{H}$  spectrum of compound **21** ( $\text{CDCl}_3$ , 400 MHz)

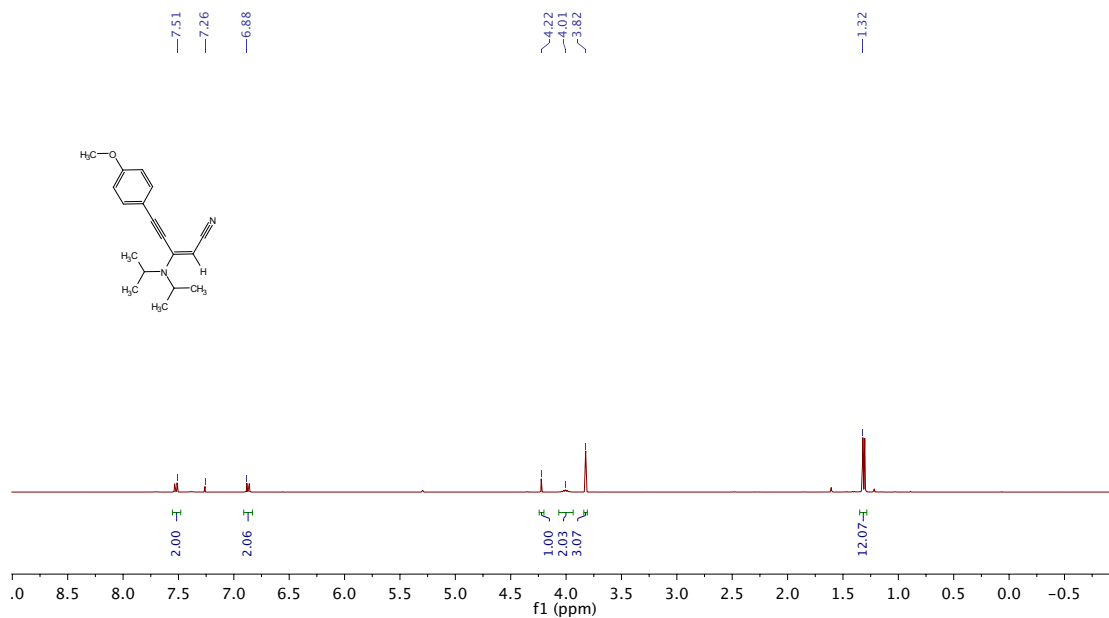

$^{13}\text{C}$  spectrum of compound **21** ( $\text{CDCl}_3$ , 125 MHz)

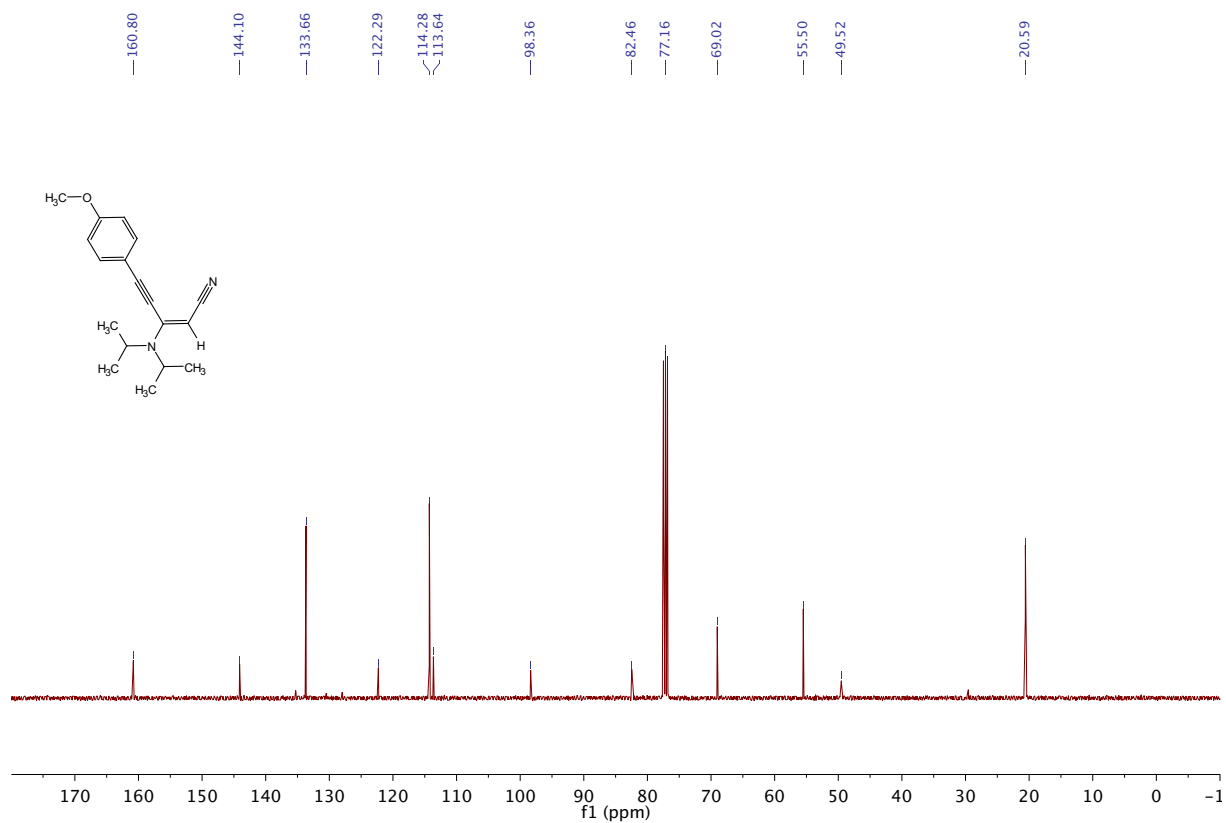

$^1\text{H}$  spectrum of compound **22** ( $\text{CDCl}_3$ , 400 MHz)

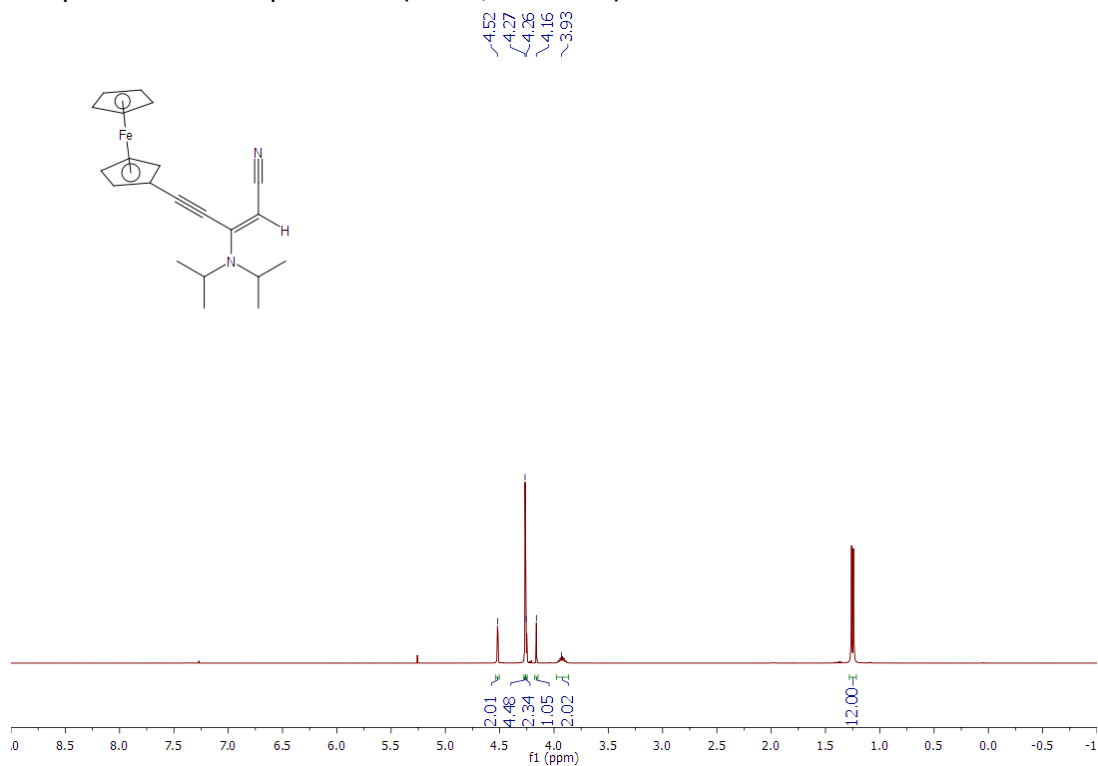

$^{13}\text{C}$  spectrum of compound **22** ( $\text{CDCl}_3$ , 125 MHz)

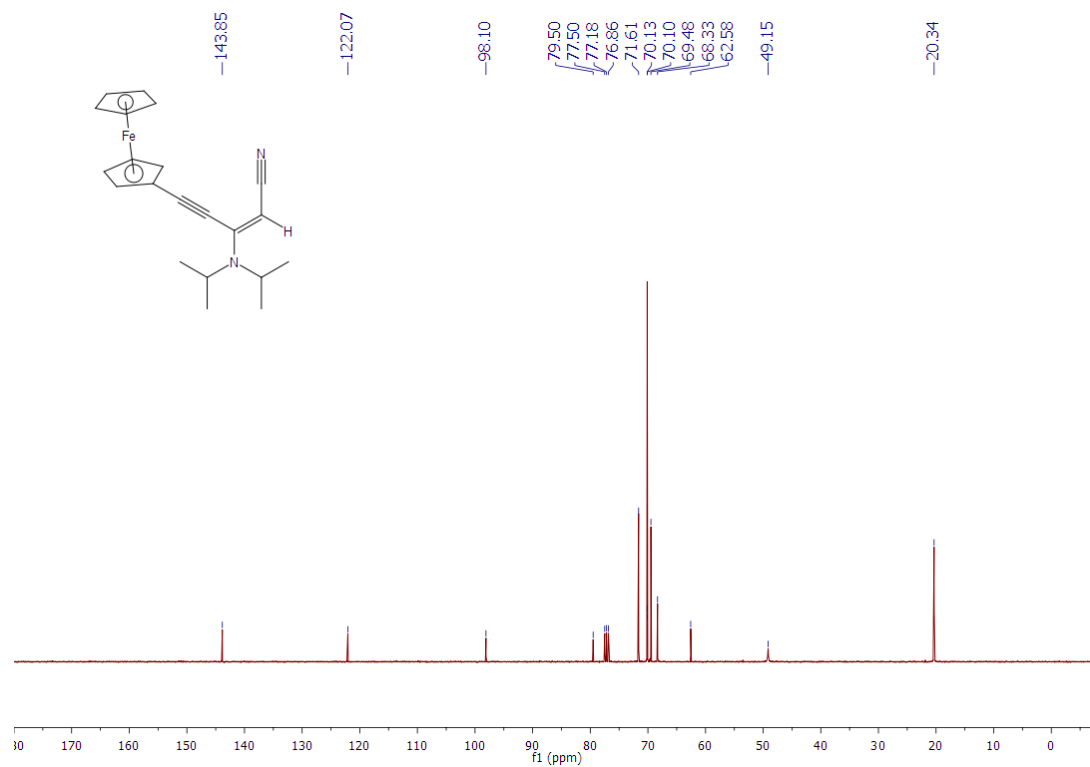



<sup>1</sup>H spectrum of compound **23** (CDCl<sub>3</sub>, 400 MHz)

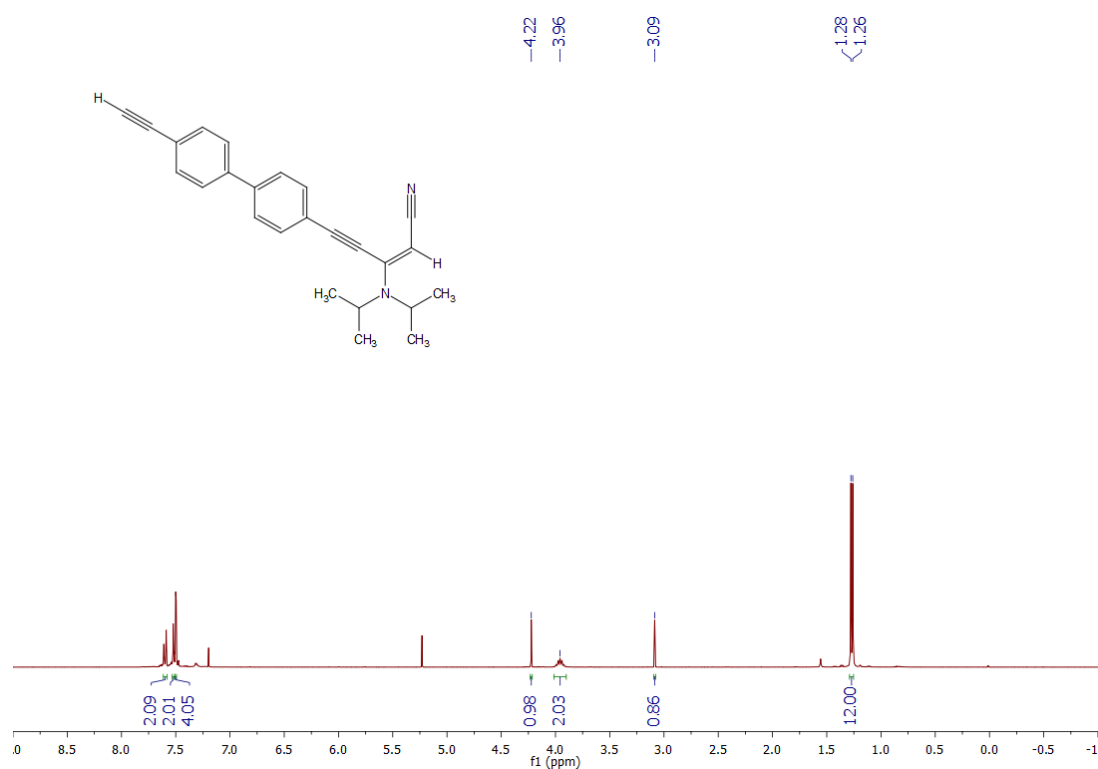

<sup>13</sup>C spectrum of compound **23** (CDCl<sub>3</sub>, 125 MHz)

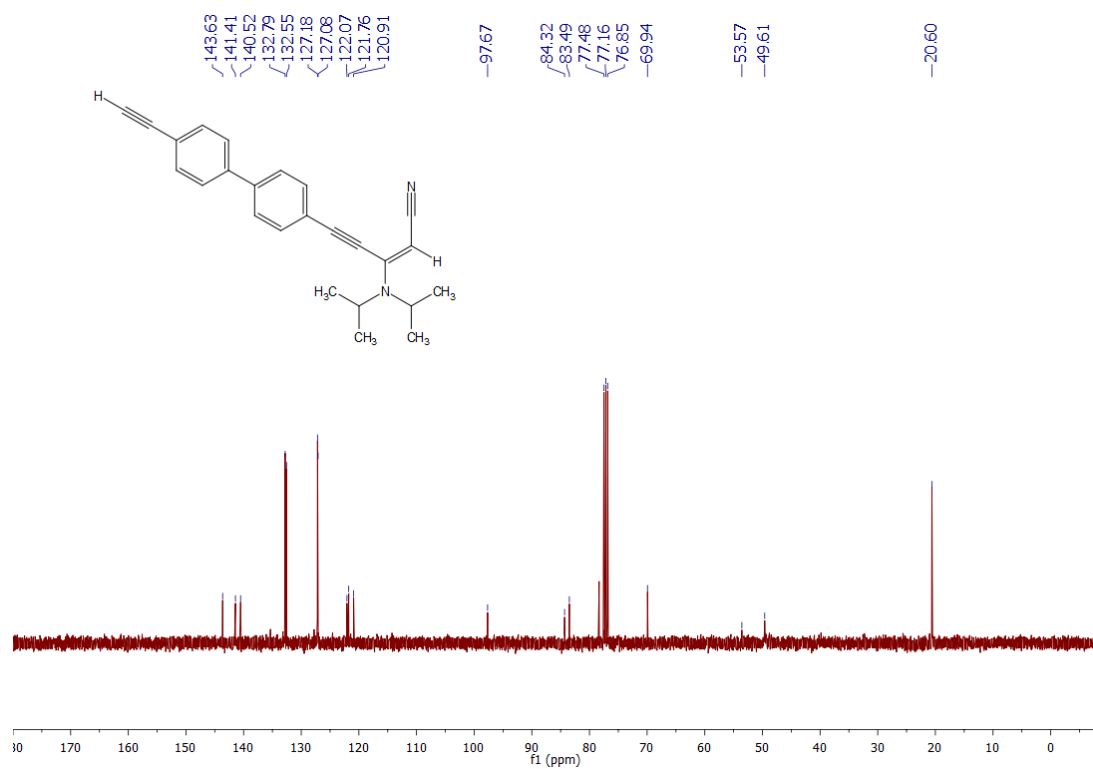

$^1\text{H}$  spectrum of compound **24** ( $\text{CDCl}_3$ , 400 MHz)

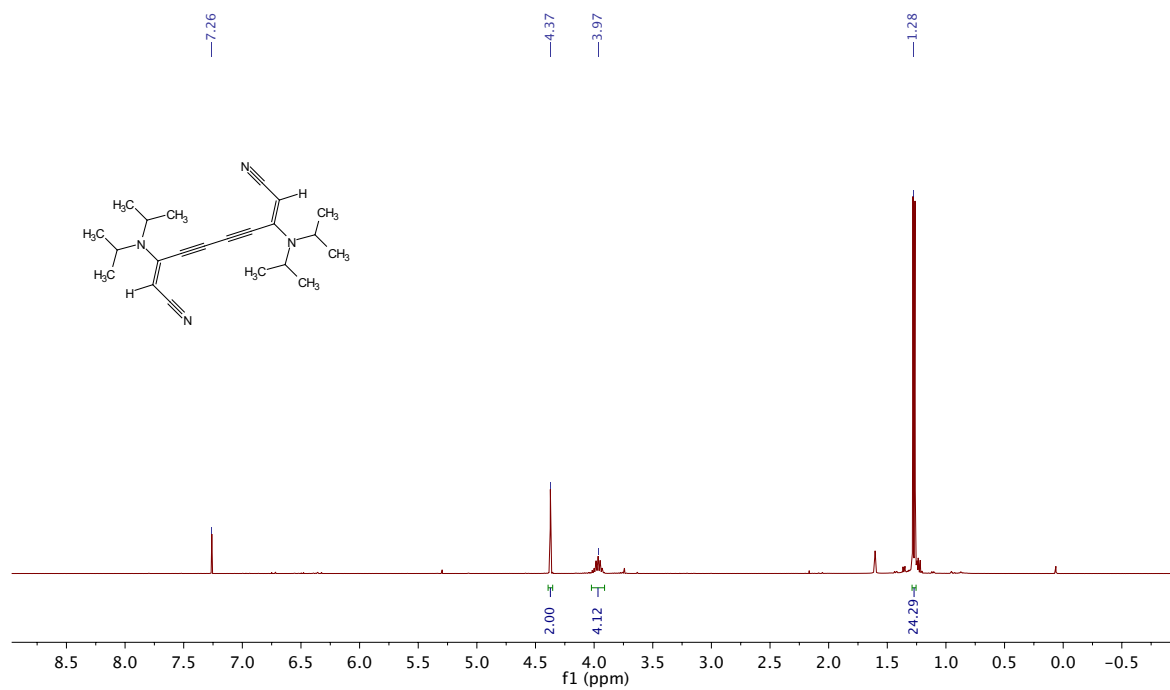

## Theoretical calculations of E/Z conformers of enynes systems

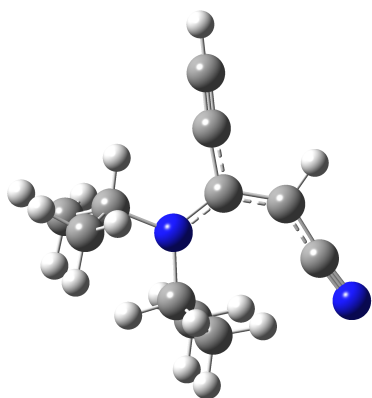

Model Z

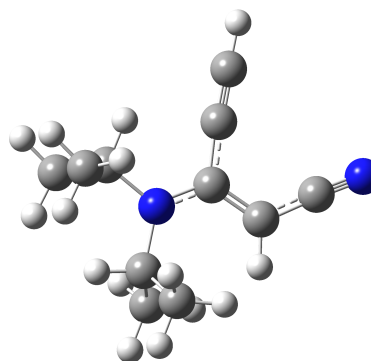

Model E

### Gas-Phase

|                                   | Model Z            | Model E            | Differences (kJ/mol) |
|-----------------------------------|--------------------|--------------------|----------------------|
| <b>B3LYP/6-31+g(d,p)</b>          |                    |                    |                      |
| Enthalpy                          | -537.977805 (a.u.) | -537.982753 (a.u.) | 13.0                 |
| Free energy                       | -538.035818        | -538.041625        | 15.2                 |
| <b>High-level (G4MP2)</b>         |                    |                    |                      |
| Enthalpy                          | -537.331187 (a.u.) | -537.335201        | 10.5                 |
| Free energy                       | -537.335201        | -537.394459        | 11.6                 |
| <b>In THF (B3lyp/6-31+G(d,p))</b> |                    |                    |                      |
| Enthalpy                          | -537.987174        | -537.995100        | 20.8                 |
| Free energy                       | -538.045144        | -538.054451        | 24.4                 |

Model Z – B3LYP/6-31+G(d,p) calculations

Optimized geometry (cartesian coordinates in Å)

|   |           |           |           |
|---|-----------|-----------|-----------|
| 6 | -3.320832 | 0.597983  | -0.123011 |
| 6 | -2.550485 | 1.461513  | 0.641866  |
| 7 | -4.611898 | 0.153251  | 0.016322  |
| 6 | -5.185513 | -0.791826 | -0.981815 |
| 6 | -6.366896 | -0.176319 | -1.748087 |
| 6 | -5.535205 | -2.151216 | -0.356130 |
| 1 | -4.395608 | -0.971771 | -1.709105 |
| 1 | -6.077281 | 0.769414  | -2.215699 |
| 1 | -6.685303 | -0.863968 | -2.538740 |
| 1 | -7.235364 | 0.007715  | -1.106886 |
| 1 | -4.665165 | -2.583589 | 0.146895  |
| 1 | -6.354039 | -2.083935 | 0.367903  |
| 1 | -5.852331 | -2.843142 | -1.143558 |
| 6 | -5.529841 | 0.544056  | 1.118638  |
| 6 | -5.925949 | 2.030690  | 1.085604  |
| 6 | -5.082637 | 0.028301  | 2.497806  |
| 1 | -6.446204 | -0.003520 | 0.889475  |
| 1 | -6.313856 | 2.297942  | 0.097965  |
| 1 | -6.720892 | 2.200631  | 1.819943  |
| 1 | -5.107332 | 2.704696  | 1.332884  |
| 1 | -4.903874 | -1.050544 | 2.459536  |
| 1 | -4.186040 | 0.517231  | 2.875464  |
| 1 | -5.884149 | 0.214157  | 3.221066  |
| 6 | -2.581747 | 0.104014  | -1.264019 |
| 6 | -1.889181 | -0.257746 | -2.189654 |
| 1 | -1.285663 | -0.581935 | -3.007223 |
| 6 | -2.819076 | 2.182204  | 1.823484  |
| 7 | -2.939414 | 2.818652  | 2.797391  |
| 1 | -1.545295 | 1.621073  | 0.268761  |

Enthalpy = -537.977805 hartrees

Free energy = -538.035818 hartrees

Model E – B3LYP/6-31+G(d,p) calculations  
Optimized geometry (cartesian coordinates in Å)

|   |           |           |           |
|---|-----------|-----------|-----------|
| 6 | 0.765850  | -0.111765 | -0.123861 |
| 6 | 1.625667  | 0.964855  | -0.213069 |
| 1 | 1.268036  | 1.981480  | -0.161581 |
| 6 | 3.023334  | 0.820341  | -0.376683 |
| 7 | 4.182423  | 0.762330  | -0.511674 |
| 7 | -0.599649 | -0.037651 | 0.035103  |
| 6 | -1.418693 | -1.272941 | 0.118564  |
| 6 | -2.405700 | -1.393390 | -1.053493 |
| 6 | -2.110862 | -1.417491 | 1.483291  |
| 1 | -0.713583 | -2.098891 | 0.028744  |
| 1 | -1.881136 | -1.332427 | -2.011633 |
| 1 | -2.915744 | -2.361257 | -1.005240 |
| 1 | -3.178590 | -0.617334 | -1.032390 |
| 1 | -1.380391 | -1.373398 | 2.296547  |
| 1 | -2.866247 | -0.642811 | 1.654531  |
| 1 | -2.620527 | -2.385370 | 1.535146  |
| 6 | -1.331547 | 1.248367  | 0.132570  |
| 6 | -1.287656 | 2.082035  | -1.161964 |
| 6 | -0.990299 | 2.057478  | 1.398180  |
| 1 | -2.374566 | 0.947209  | 0.250908  |
| 1 | -1.598450 | 1.476924  | -2.018369 |
| 1 | -1.982020 | 2.924000  | -1.070024 |
| 1 | -0.300272 | 2.490467  | -1.383865 |
| 1 | -1.095939 | 1.435011  | 2.291237  |
| 1 | 0.021814  | 2.465647  | 1.394773  |
| 1 | -1.686790 | 2.898251  | 1.484803  |
| 6 | 1.362853  | -1.418132 | -0.205807 |
| 6 | 1.943440  | -2.477610 | -0.283502 |
| 1 | 2.470002  | -3.402735 | -0.353648 |

Enthalpy = -537.982753 hartrees

Free energy = -538.041625 hartrees

Model Z – G4MP2 calculations

Optimized geometry (cartesian coordinates in Å)

|   |           |           |           |
|---|-----------|-----------|-----------|
| 6 | -0.165294 | 1.091130  | -0.000215 |
| 6 | -1.490822 | 1.473623  | -0.000343 |
| 7 | 0.430301  | -0.141720 | -0.000061 |
| 6 | 1.909884  | -0.248707 | -0.000217 |
| 6 | 2.442682  | -0.918230 | -1.275613 |
| 6 | 2.443033  | -0.916827 | 1.275765  |
| 1 | 2.282366  | 0.773794  | -0.000855 |
| 1 | 2.081248  | -0.398159 | -2.167018 |
| 1 | 3.536475  | -0.879179 | -1.277842 |
| 1 | 2.154340  | -1.971289 | -1.351048 |
| 1 | 2.082030  | -0.395627 | 2.166686  |
| 1 | 2.154470  | -1.969729 | 1.352544  |
| 1 | 3.536835  | -0.878019 | 1.277558  |
| 6 | -0.294985 | -1.434103 | 0.000481  |
| 6 | -1.087558 | -1.694592 | -1.291206 |
| 6 | -1.087528 | -1.693494 | 1.292404  |
| 1 | 0.507860  | -2.173574 | 0.000795  |
| 1 | -0.446985 | -1.552543 | -2.166242 |
| 1 | -1.432070 | -2.733846 | -1.288681 |
| 1 | -1.966828 | -1.061068 | -1.393298 |
| 1 | -0.446938 | -1.550670 | 2.167303  |
| 1 | -1.966823 | -1.059920 | 1.393988  |
| 1 | -1.432010 | -2.732759 | 1.290777  |
| 6 | 0.710793  | 2.235730  | -0.000234 |
| 6 | 1.364479  | 3.246713  | -0.000217 |
| 1 | 1.949893  | 4.133312  | -0.000223 |
| 6 | -2.690738 | 0.743559  | -0.000460 |
| 7 | -3.733246 | 0.226709  | -0.000567 |
| 1 | -1.645362 | 2.545505  | -0.000401 |

Enthalpy = -537.331187 hartrees

Free Energy = -537.335201 hartrees

Model E – G4MP2 calculations

Optimized geometry (cartesian coordinates in Å)

|   |           |           |           |
|---|-----------|-----------|-----------|
| 6 | -0.762907 | 0.195193  | -0.000107 |
| 6 | -1.714774 | -0.795555 | -0.000115 |
| 1 | -1.445162 | -1.839008 | -0.000015 |
| 6 | -3.098747 | -0.524750 | -0.000225 |
| 7 | -4.247788 | -0.353318 | -0.000298 |
| 7 | 0.597109  | 0.004567  | -0.000001 |
| 6 | 1.519476  | 1.160060  | 0.000168  |
| 6 | 2.374407  | 1.219865  | -1.274539 |
| 6 | 2.374061  | 1.219764  | 1.275110  |
| 1 | 0.882769  | 2.043869  | 0.000110  |
| 1 | 1.741845  | 1.220634  | -2.166455 |
| 1 | 2.967493  | 2.139637  | -1.275977 |
| 1 | 3.075049  | 0.381848  | -1.349167 |
| 1 | 1.741256  | 1.220501  | 2.166856  |
| 1 | 3.074647  | 0.381711  | 1.349876  |
| 1 | 2.967182  | 2.139512  | 1.276767  |
| 6 | 1.218792  | -1.336024 | 0.000087  |
| 6 | 0.954193  | -2.136452 | -1.287654 |
| 6 | 0.953633  | -2.136577 | 1.287636  |
| 1 | 2.291035  | -1.130206 | 0.000332  |
| 1 | 1.236001  | -1.550167 | -2.166281 |
| 1 | 1.561392  | -3.046955 | -1.276432 |
| 1 | -0.088313 | -2.433726 | -1.407525 |
| 1 | 1.234882  | -1.550312 | 2.166455  |
| 1 | -0.088886 | -2.434040 | 1.406939  |
| 1 | 1.560987  | -3.046979 | 1.276664  |

|   |           |          |           |
|---|-----------|----------|-----------|
| 6 | -1.249573 | 1.543904 | -0.000205 |
| 6 | -1.732643 | 2.645909 | -0.000227 |
| 1 | -2.172927 | 3.612908 | 0.000382  |

Enthalpy = -537.335201 hartrees

Free Energy = -537.394459 hartrees

Model Z – B3LYP/6-31+G(d,p) calculations in THF solvent  
Optimized geometry (cartesian coordinates in Å)

|   |           |           |           |
|---|-----------|-----------|-----------|
| 6 | -0.166797 | 1.082805  | -0.000189 |
| 6 | -1.506081 | 1.466889  | -0.000238 |
| 7 | 0.431509  | -0.143451 | -0.000057 |
| 6 | 1.921731  | -0.250640 | -0.000207 |
| 6 | 2.447524  | -0.920965 | -1.277991 |
| 6 | 2.447863  | -0.919606 | 1.278146  |
| 1 | 2.292287  | 0.772676  | -0.000824 |
| 1 | 2.085716  | -0.400264 | -2.169585 |
| 1 | 3.541479  | -0.879632 | -1.279112 |
| 1 | 2.160072  | -1.974876 | -1.350639 |
| 1 | 2.086428  | -0.397850 | 2.169276  |
| 1 | 2.160237  | -1.973382 | 1.352063  |
| 1 | 3.541825  | -0.878463 | 1.278868  |
| 6 | -0.295408 | -1.441421 | 0.000455  |
| 6 | -1.082022 | -1.694800 | -1.296998 |
| 6 | -1.081991 | -1.693785 | 1.298121  |
| 1 | 0.505169  | -2.182273 | 0.000742  |
| 1 | -0.422809 | -1.594763 | -2.164131 |
| 1 | -1.467548 | -2.719677 | -1.280100 |
| 1 | -1.931905 | -1.026823 | -1.429757 |
| 1 | -0.422755 | -1.593063 | 2.165159  |
| 1 | -1.931886 | -1.025726 | 1.430397  |
| 1 | -1.467501 | -2.718679 | 1.282027  |
| 6 | 0.706305  | 2.236617  | -0.000280 |



|   |           |          |           |
|---|-----------|----------|-----------|
| 6 | 1.355315  | 3.259526 | -0.000328 |
| 1 | 1.943162  | 4.151299 | -0.000349 |
| 6 | -2.709894 | 0.740618 | -0.000279 |
| 7 | -3.772540 | 0.246751 | -0.000328 |
| 1 | -1.667983 | 2.538979 | -0.000298 |

Enthalpy = -537.987174 hartrees

Free energy = -538.045144 hartrees

Model E – B3LYP/6-31+G(d,p) calculations in THF solvent  
Optimized geometry (cartesian coordinates in Å)

|   |           |           |           |
|---|-----------|-----------|-----------|
| 6 | -0.758870 | 0.201113  | -0.000054 |
| 6 | -1.718119 | -0.801637 | -0.000081 |
| 1 | -1.451124 | -1.846697 | -0.000008 |
| 6 | -3.100396 | -0.529979 | -0.000206 |
| 7 | -4.259902 | -0.364006 | -0.000324 |
| 7 | 0.592686  | 0.007717  | 0.000010  |
| 6 | 1.526889  | 1.167653  | 0.000191  |
| 6 | 2.377987  | 1.217529  | -1.277428 |
| 6 | 2.377540  | 1.217470  | 1.278109  |
| 1 | 0.894571  | 2.054629  | 0.000093  |
| 1 | 1.743740  | 1.219284  | -2.168841 |
| 1 | 2.971919  | 2.137101  | -1.278694 |
| 1 | 3.076126  | 0.377152  | -1.349654 |
| 1 | 1.742978  | 1.219261  | 2.169298  |
| 1 | 3.075586  | 0.377036  | 1.350573  |
| 1 | 2.971541  | 2.136998  | 1.279595  |
| 6 | 1.220114  | -1.341600 | 0.000006  |
| 6 | 0.955897  | -2.140348 | -1.288990 |
| 6 | 0.955719  | -2.140542 | 1.288853  |
| 1 | 2.290118  | -1.129011 | 0.000114  |

|   |           |           |           |
|---|-----------|-----------|-----------|
| 1 | 1.197929  | -1.539354 | -2.170007 |
| 1 | 1.600439  | -3.025240 | -1.293102 |
| 1 | -0.075518 | -2.483821 | -1.387240 |
| 1 | 1.197068  | -1.539486 | 2.170014  |
| 1 | -0.075551 | -2.484580 | 1.386644  |
| 1 | 1.600719  | -3.025100 | 1.293184  |
| 6 | -1.249314 | 1.555523  | -0.000126 |
| 6 | -1.740904 | 2.662307  | -0.000193 |
| 1 | -2.169289 | 3.640925  | -0.000256 |

Enthalpy = -537.995100 hartrees

Free energy = -538.054451 hartrees

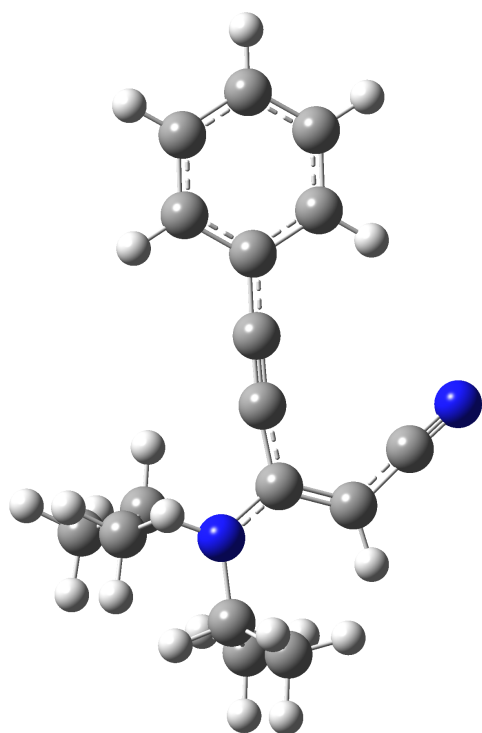

Compound **6**, isomer Z  
isomer E

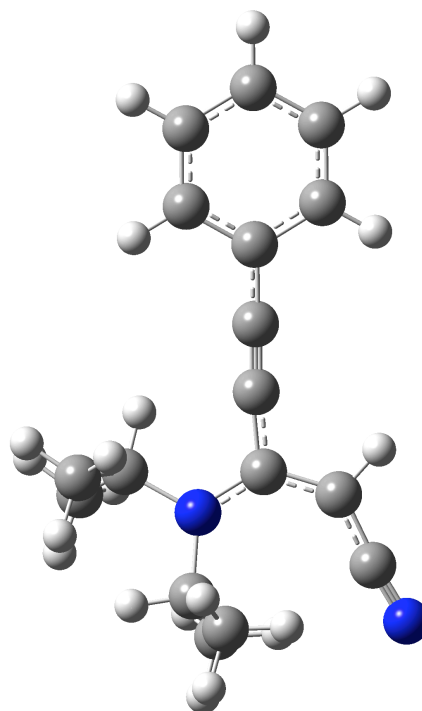

Compound **6**,

**Gas-Phase**

|                          | Isomer Z           | Isomer E           | Differences (kJ/mol) |
|--------------------------|--------------------|--------------------|----------------------|
| <b>B3LYP/6-31+g(d,p)</b> |                    |                    |                      |
| Enthalpy                 | -768.972698 (a.u.) | -768.979158 (a.u.) | 17.0                 |

Free energy -769.044194

-769.050500

16.5

Compound **6**, Isomer Z – B3LYP/6-31+G(d,p) calculations

Optimized geometry (cartesian coordinates in Å)

|   |           |           |           |
|---|-----------|-----------|-----------|
| 6 | 1.031393  | -0.626451 | 0.075245  |
| 6 | 1.358378  | -1.975818 | 0.056732  |
| 7 | 1.825892  | 0.496125  | 0.099580  |
| 6 | 1.195468  | 1.832848  | 0.277426  |
| 6 | 1.176205  | 2.642800  | -1.028781 |
| 6 | 1.814371  | 2.619514  | 1.443716  |
| 1 | 0.159824  | 1.635761  | 0.552225  |
| 1 | 0.674302  | 2.083995  | -1.824223 |
| 1 | 0.633284  | 3.581744  | -0.875004 |
| 1 | 2.183776  | 2.900234  | -1.372354 |
| 1 | 1.785446  | 2.036002  | 2.368591  |
| 1 | 2.851124  | 2.915756  | 1.253870  |
| 1 | 1.238266  | 3.537250  | 1.602368  |
| 6 | 3.287188  | 0.514122  | -0.177489 |
| 6 | 3.660923  | -0.121583 | -1.527440 |
| 6 | 4.149565  | 0.039081  | 1.005834  |
| 1 | 3.506563  | 1.577945  | -0.292950 |
| 1 | 3.047282  | 0.299522  | -2.330040 |
| 1 | 4.709376  | 0.109918  | -1.743948 |
| 1 | 3.559953  | -1.205944 | -1.543153 |
| 1 | 3.891498  | 0.592430  | 1.913205  |
| 1 | 4.050300  | -1.026447 | 1.207474  |
| 1 | 5.203707  | 0.233964  | 0.778465  |
| 6 | -0.393680 | -0.416530 | 0.059212  |
| 6 | -1.607995 | -0.339448 | 0.027676  |
| 6 | 2.595008  | -2.647941 | 0.120558  |
| 7 | 3.566269  | -3.298097 | 0.173540  |
| 1 | 0.510001  | -2.648539 | 0.005917  |
| 6 | -3.031430 | -0.245036 | -0.003893 |
| 6 | -3.824772 | -1.401762 | 0.143821  |
| 6 | -3.666652 | 1.001135  | -0.183871 |
| 6 | -5.214907 | -1.309319 | 0.112144  |
| 1 | -3.340657 | -2.363002 | 0.282538  |
| 6 | -5.057376 | 1.083767  | -0.213101 |
| 1 | -3.061847 | 1.894611  | -0.301227 |
| 6 | -5.835772 | -0.068837 | -0.065599 |
| 1 | -5.815043 | -2.207095 | 0.226621  |
| 1 | -5.535180 | 2.049011  | -0.352454 |
| 1 | -6.919262 | -0.000686 | -0.089584 |

Enthalpy = -768.972698 hartrees

Free energy = -769.044194 hartrees

Compound **6**, Isomer E – B3LYP/6-31+G(d,p) calculations

Optimized geometry (cartesian coordinates in Å)

|   |           |           |           |
|---|-----------|-----------|-----------|
| 6 | -1.181218 | 0.584152  | 0.057796  |
| 6 | -1.439765 | 1.941515  | 0.144668  |
| 1 | -2.445438 | 2.330819  | 0.170328  |
| 6 | -0.406266 | 2.903907  | 0.205254  |
| 7 | 0.419898  | 3.729467  | 0.257061  |
| 7 | -2.134717 | -0.407621 | -0.004598 |
| 6 | -1.728135 | -1.831119 | -0.095885 |
| 6 | -2.176192 | -2.479036 | -1.415783 |
| 6 | -2.172046 | -2.641314 | 1.132610  |
| 1 | -0.637969 | -1.821662 | -0.097120 |
| 1 | -1.812138 | -1.905652 | -2.273472 |
| 1 | -1.767817 | -3.492899 | -1.484832 |
| 1 | -3.265893 | -2.561964 | -1.492673 |
| 1 | -1.804966 | -2.181373 | 2.054911  |
| 1 | -3.261534 | -2.733293 | 1.201913  |
| 1 | -1.763895 | -3.655747 | 1.071130  |
| 6 | -3.591142 | -0.135141 | 0.014953  |
| 6 | -4.093206 | 0.625268  | -1.227199 |
| 6 | -4.089384 | 0.460777  | 1.345294  |
| 1 | -4.044735 | -1.126728 | -0.047823 |
| 1 | -3.768743 | 0.120471  | -2.141717 |
| 1 | -5.188277 | 0.643667  | -1.218635 |
| 1 | -3.744667 | 1.658369  | -1.275662 |
| 1 | -3.763187 | -0.156887 | 2.187037  |
| 1 | -3.739576 | 1.478962  | 1.524331  |
| 1 | -5.184453 | 0.480912  | 1.342011  |
| 6 | 0.198817  | 0.200266  | 0.032125  |
| 6 | 1.402918  | 0.025712  | 0.020065  |
| 6 | 2.820958  | -0.123915 | 0.009335  |
| 6 | 3.638852  | 1.023436  | 0.081592  |
| 6 | 3.421133  | -1.396629 | -0.072049 |
| 6 | 5.025982  | 0.890833  | 0.072026  |
| 1 | 3.173315  | 2.001940  | 0.144236  |
| 6 | 4.809555  | -1.516617 | -0.080836 |
| 1 | 2.793316  | -2.280387 | -0.127693 |
| 6 | 5.615130  | -0.375436 | -0.008963 |

|   |          |           |           |
|---|----------|-----------|-----------|
| 1 | 5.648844 | 1.778609  | 0.127972  |
| 1 | 5.263842 | -2.501088 | -0.143764 |
| 1 | 6.696794 | -0.472719 | -0.016052 |

Enthalpy = -768.979158 hartrees

Free energy = -769.050500 hartrees
